# Supplementary material for: Expanded Phylogenetic Diversity and Metabolic Flexibility of Mercury-Methylating Microorganisms
Source: PubMed Central journal article supplement (PMC7438021; doi:10.1128/msystems.00299-20), 2020-08-18

**S2A.**

***hgcB* Expression**

Site - depth (sample code)

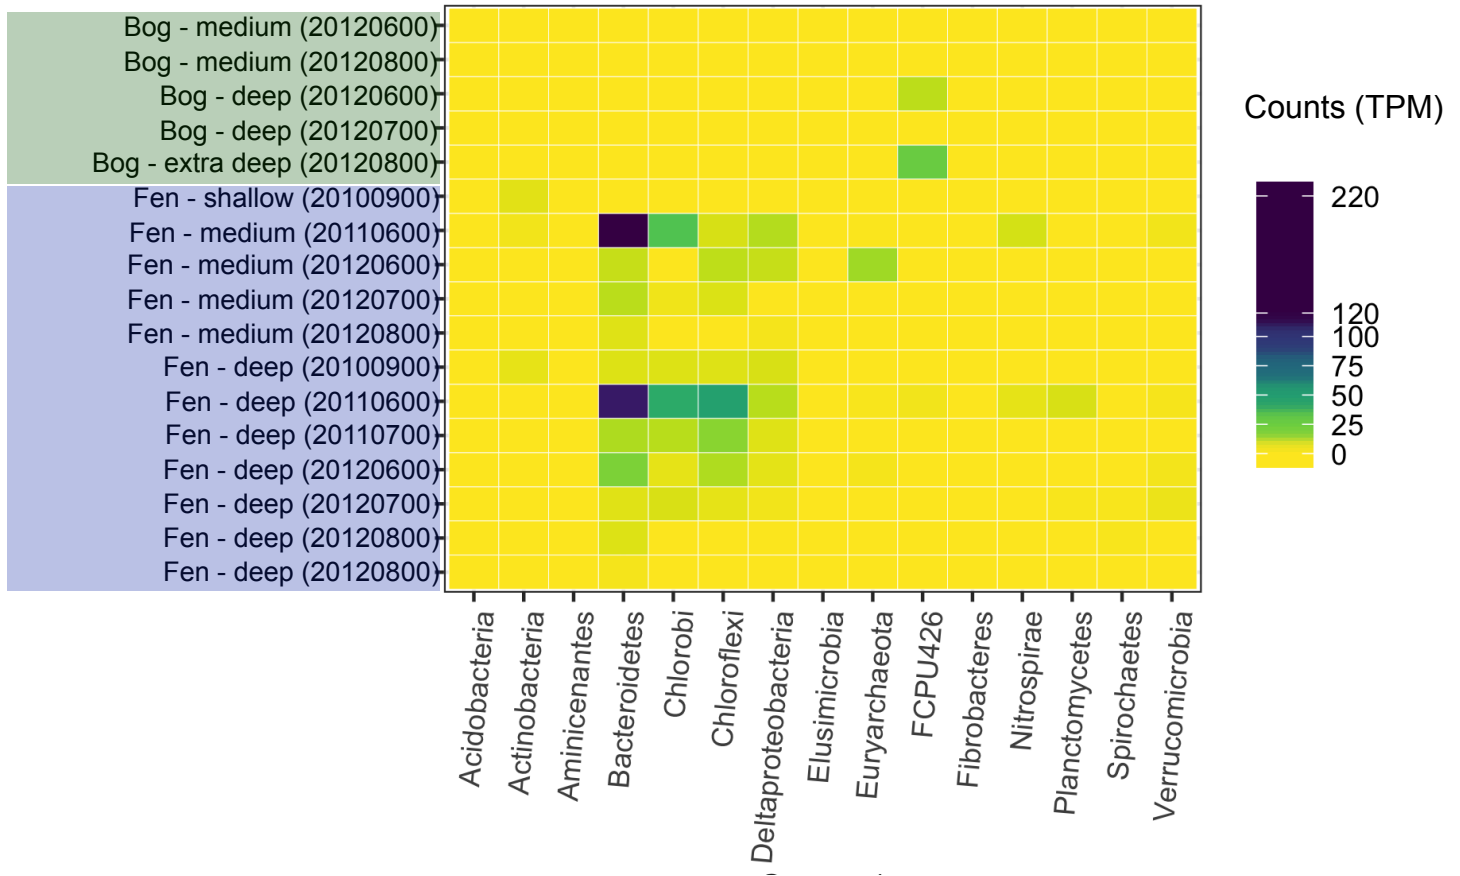

**S2B.**

**Putative Regulator Expression**

Site - depth (sample code)

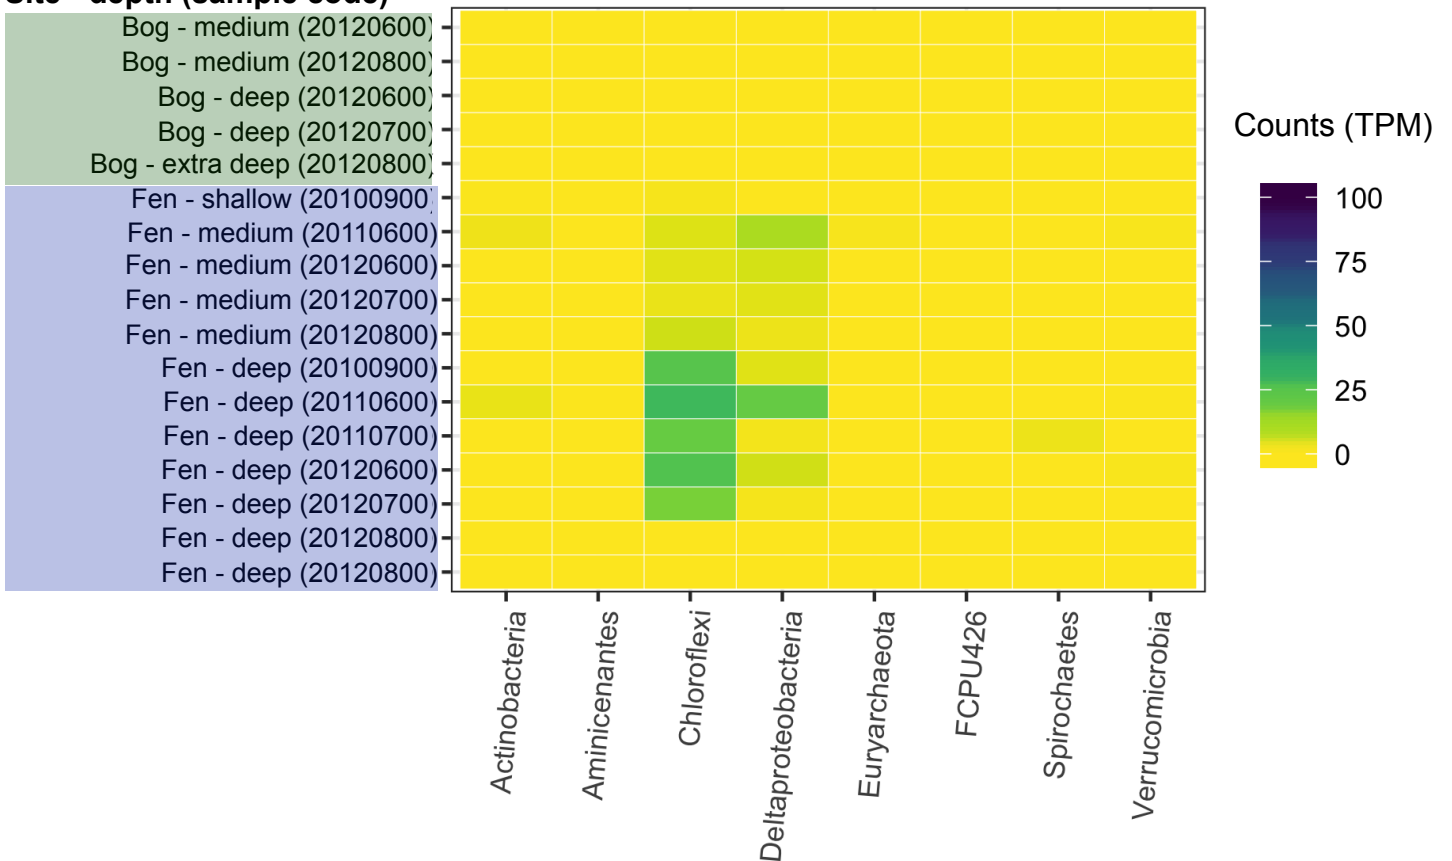

Supplement: mSystems.00299-20-sf002.pdf [file mSystems.00299-20-sf002.pdf]
