# Supplementary material for: Expanded Phylogenetic Diversity and Metabolic Flexibility of Mercury-Methylating Microorganisms
Source: PubMed Central journal article supplement (PMC7438021; doi:10.1128/msystems.00299-20), 2020-08-18

S3.

*hgcA* vs *rpoB* counts

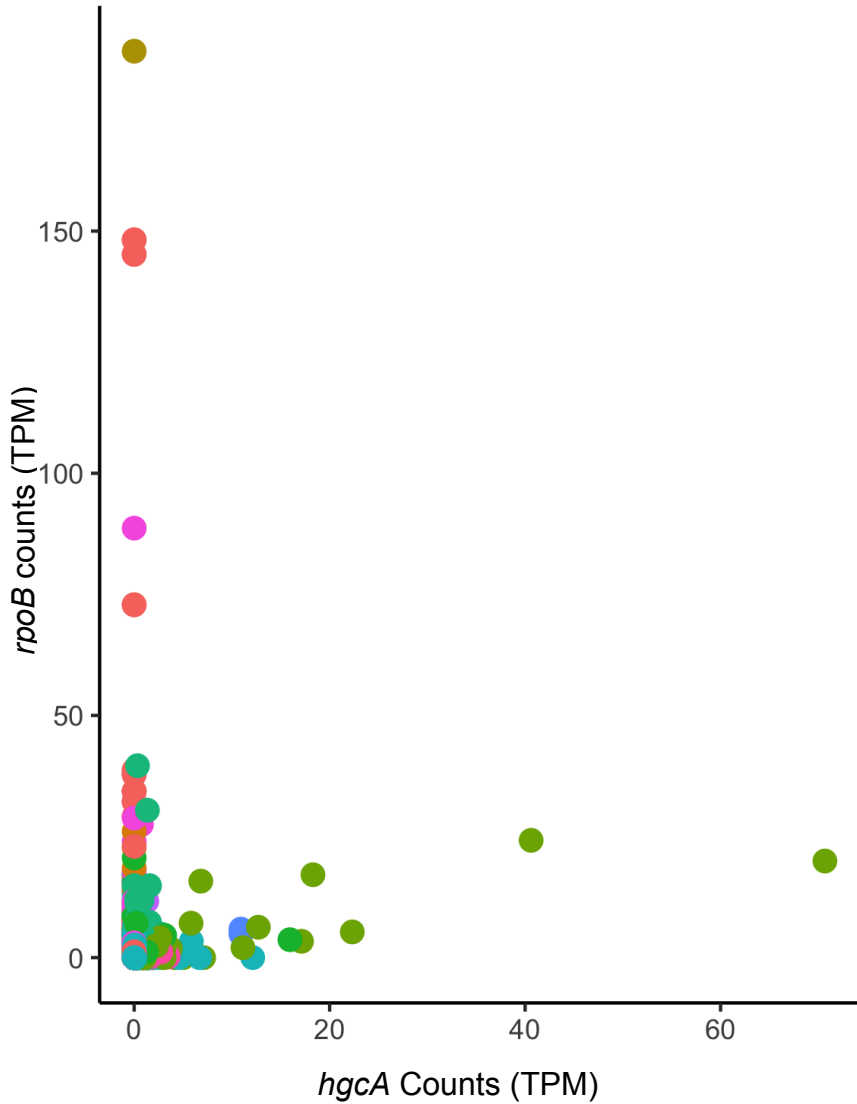

*hgcA* vs *rpoB* counts by Sample

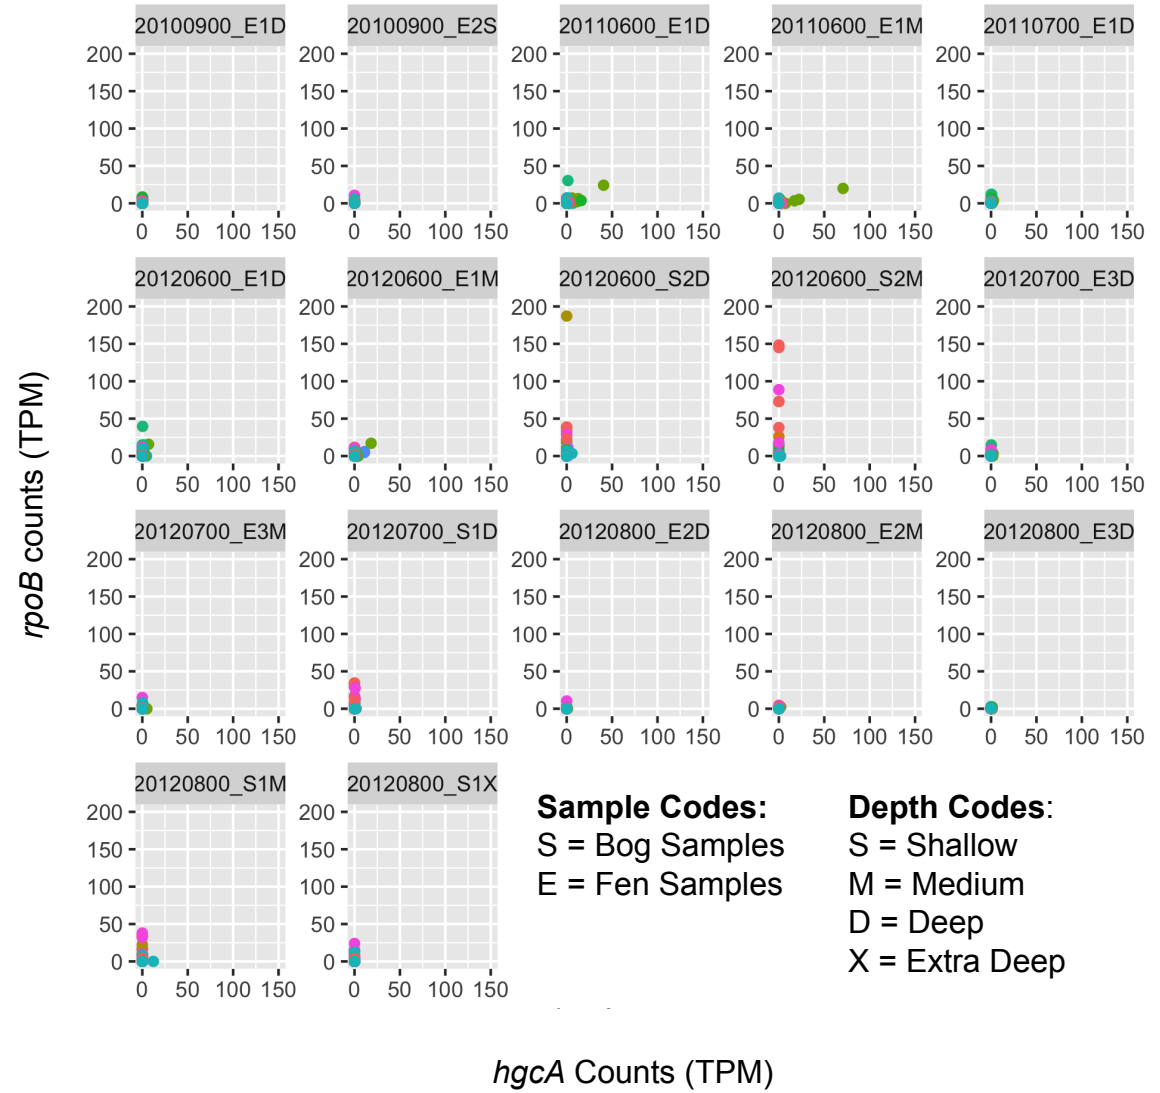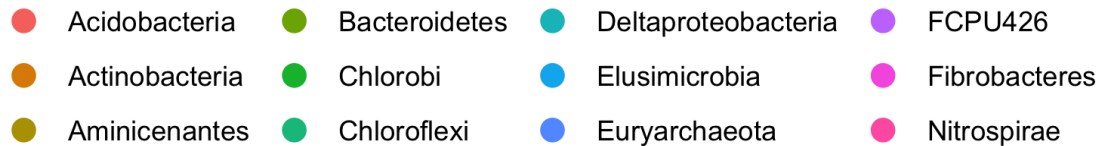

Supplement: mSystems.00299-20-sf003.pdf [file mSystems.00299-20-sf003.pdf]
